# Supplementary material for: Z-Scheme MoS2/TiO2/graphene nanohybrid photocatalysts for visible light-induced degradation for highly efficient water disinfection and antibacterial activity
Source: Royal Society of Chemistry journal article supplement (doi:10.1039/d2nj01824a), 2022-01-01
Supplement: d2nj01824a1.pdf [file d2nj01824a1.pdf]

## Supporting Information

### Z-Scheme MoS<sub>2</sub>/TiO<sub>2</sub>/Graphene Nanohybrid Photocatalysts for Visible Light-Induced Degradation for highly efficient water disinfection and antibacterial activity

Linjer Chen<sup>a</sup>, Chin-Pao Huang<sup>b</sup>, Yuliv Chuang<sup>a</sup>, Thanh-Binh Nguyen<sup>a</sup>, Chiu-Wen Chen<sup>a,\*</sup>, Cheng-Di Dong<sup>a,\*</sup>

---

<sup>a</sup>Department of Marine Environmental Engineering,  
National Kaohsiung University of Science and Technology, Kaohsiung 81157,  
Taiwan.

<sup>b</sup>Department of Civil and Environmental Engineering, University of Delaware,  
Newark, DE, 19716 USA

Corresponding author.

E-mail address: C. W. Chen (E-mail: cwchen@nkust.edu.tw), C. D. Dong (E-mail: cddong@nkust.edu.tw)

Tel.: +886-7-361-7141 Fax: +886-7-365-0548

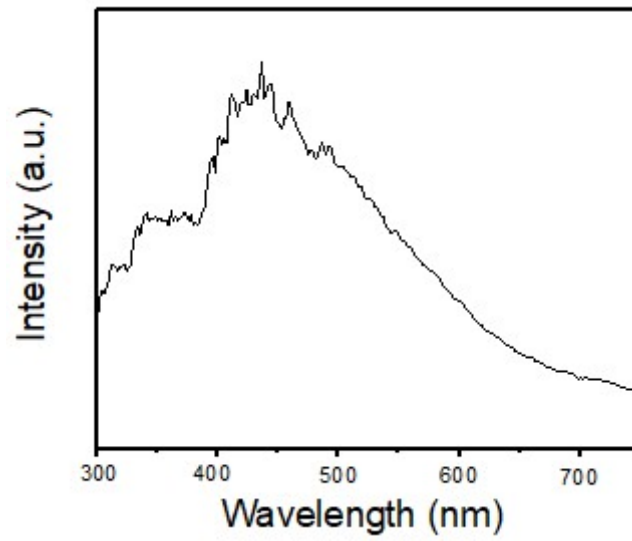

**Fig. S1.** Measured spectrum of a tungsten halogen lamp.

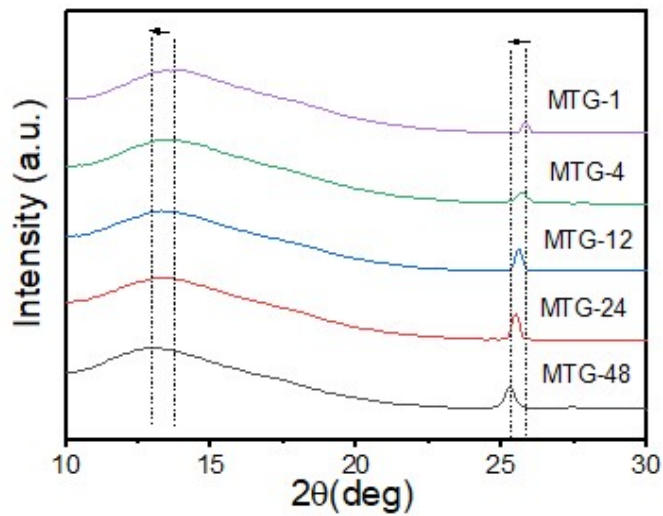

**Fig. S2.** (a) XRD spectra of the MoS<sub>2</sub>/TiO<sub>2</sub>/Graphene (MTG-1, MTG-4, MTG-12, MTG-24 and MTG-48) nanohybrids.

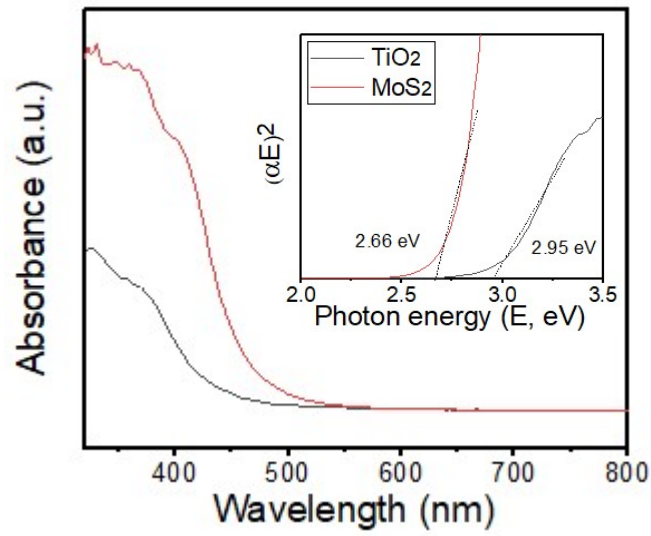

**Fig. S3.** UV-vis diffuse reflectance spectra of the as-prepared materials. Inset: Plots of  $(\alpha h\nu)^{1/2}$  as a function of  $E_g$  photon energy.

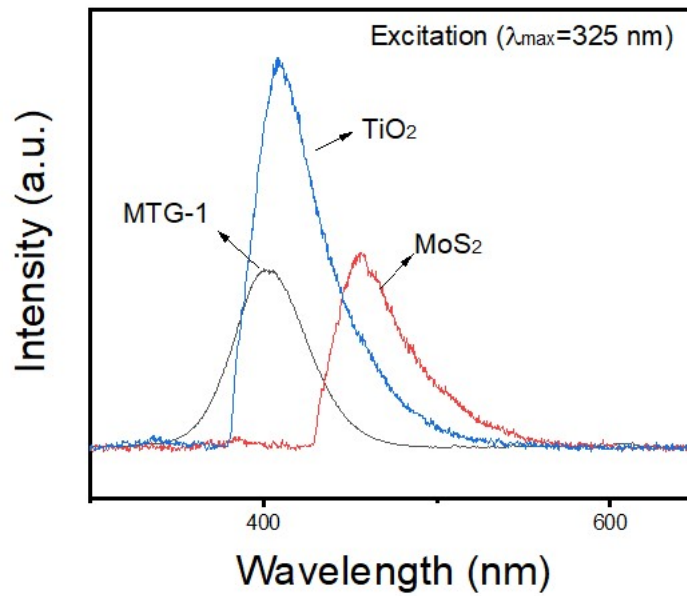

**Fig. S4.** Photoluminescence spectra of pure TiO<sub>2</sub>, MoS<sub>2</sub> and MTG-1 samples.

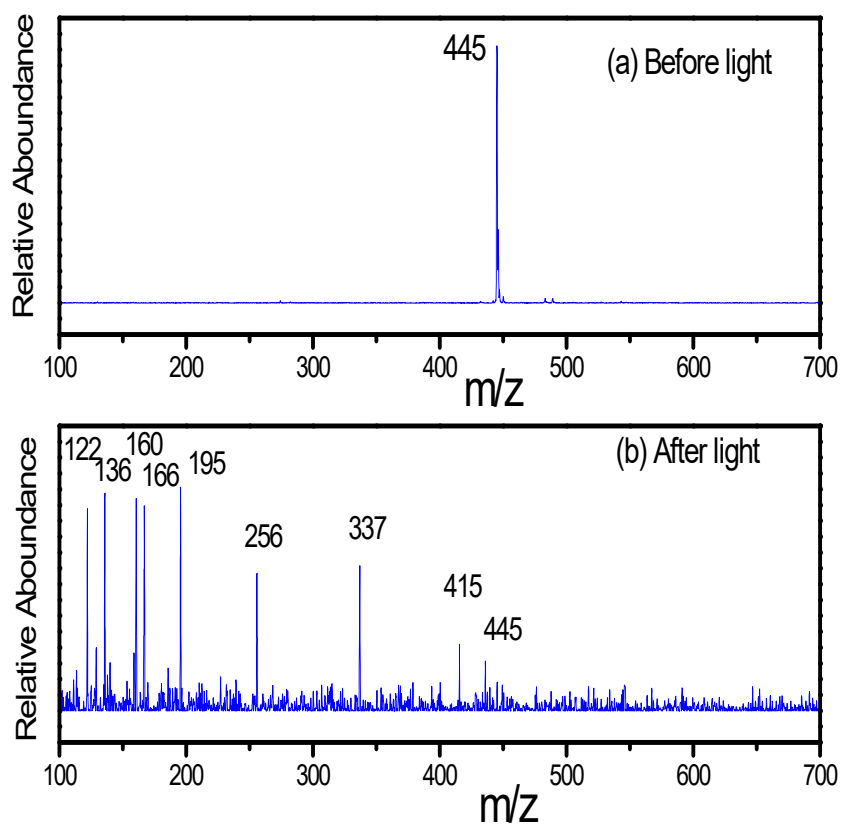

**Fig. S5.** Mass spectra ( $m/z$  values) of TC by Z-scheme nanohybrids: TC solution (a) before and (b) after photodegradation under visible light at 60 min, respectively.

**Table S1.** Comparison of photocatalytic efficiency of different MoS<sub>2</sub>/TiO<sub>2</sub>-based hybrid photocatalysts with respect to pollutant degradation.

| Samples                                                   | C <sup>a</sup><br>(g·L <sup>-1</sup> ) | C <sub>TC</sub> <sup>b</sup><br>(mg·L <sup>-1</sup> ) | Targeted pollutant | Reaction Time (min) | Degradation Efficiency | k <sub>app</sub> (min <sup>-1</sup> ) × 10 <sup>-3</sup> | References |
|-----------------------------------------------------------|----------------------------------------|-------------------------------------------------------|--------------------|---------------------|------------------------|----------------------------------------------------------|------------|
| TiO <sub>2</sub> /MoS <sub>2</sub>                        | 0.2                                    | 40                                                    | MB                 | 60                  | 70.4%                  | 10                                                       | [3]        |
| MoS <sub>2</sub> /TiO <sub>2</sub> /Si NW                 | 0.5                                    | 5                                                     | RhB                | 180                 | 90.2%                  | 12                                                       | [11]       |
| MoS <sub>2</sub> -TiO <sub>2</sub> nanocomposite          | 0.03                                   | 10                                                    | RhB                | 60                  | 90.5%                  | 30                                                       | [12]       |
| MoS <sub>2</sub> /TNT@CNTs                                | 0.5                                    | 30                                                    | RhB                | 50                  | 94.2%                  | 18                                                       | [16]       |
| MoS <sub>2</sub> /TiO <sub>2</sub>                        | 0.025                                  | 10                                                    | TC                 | 100                 | 84.2%                  | 18                                                       | [25]       |
| MoS <sub>2</sub> /Ag/g-C <sub>3</sub> N <sub>4</sub>      | 0.01                                   | 10                                                    | TC                 | 50                  | 79.7 %                 | 42                                                       | [31]       |
| MoS <sub>2</sub> /TiO <sub>2</sub> /graphene <sup>c</sup> | 0.01                                   | 10                                                    | TC                 | 60                  | 95%                    | 48                                                       | This work  |

a: C = concentration of photocatalyst; b: C<sub>TC</sub> = TC concentration; [TC] = 10 mg/L; pH = 6.8; Temperature=25°C; Photocatalysts =10 mg/L; Method: hydrothermal process.

**Table S2.** Results of BET analysis (The error bars in the figures are the result of three repeated experiments).

| Samples          | Specific surface area<br>(m <sup>2</sup> /g, BET) | Total pore volume<br>(cm <sup>3</sup> /g, BET) | Average pore diameter<br>(nm, BJH) |
|------------------|---------------------------------------------------|------------------------------------------------|------------------------------------|
| TiO <sub>2</sub> | 25.6±5                                            | 0.114±0.02                                     | 35.2±5                             |
| MoS <sub>2</sub> | 29.3±5                                            | 0.132±0.02                                     | 28.4±5                             |
| MTG-48           | 58.6±5                                            | 0.256±0.02                                     | 6.8±3                              |
